# Supplementary material for: PINK1/Parkin-mediated mitophagy inhibits warangalone-induced mitochondrial apoptosis in breast cancer cells
Source: Aging (Albany NY). 2021 Apr 30;13(9):12955–72. doi: 10.18632/aging.202965 (PMC8148507; doi:10.18632/aging.202965)
Supplement: Supplementary Figure 1 [file aging-13-202965-s001.pdf]

## SUPPLEMENTARY FIGURE

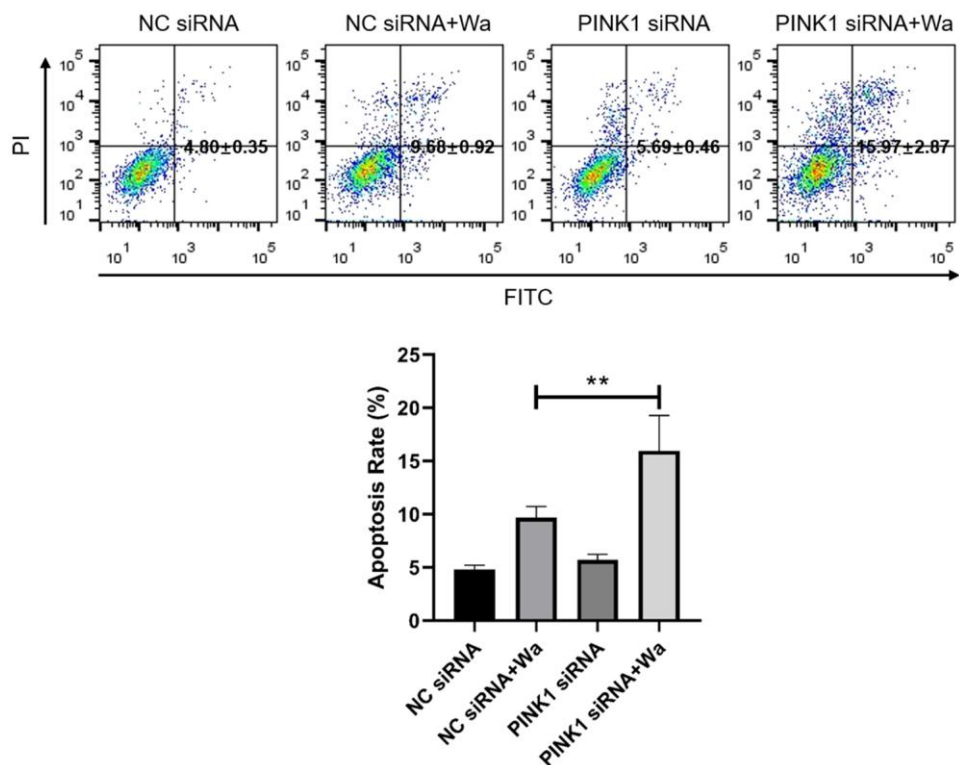

**Supplementary Figure 1. Inhibition of mitophagy promotes apoptosis.** PINK1 was knocked down by PINK1 siRNA in MDA-MB-231 cells. After treatment with 20  $\mu$ M warangalone for 12 h, Annexin V-FITC/PI assay was used to detect the apoptosis rate. One-way ANOVA was used for statistical analysis ( $n \geq 3$ ). \* $P < 0.05$ , \*\* $P < 0.01$ , \*\*\* $P < 0.001$  compared to the respective control group.
